# Supplementary material
Source: MDPI journal article supplement (https://www.mdpi.com/2073-4344/8/9/360)
Supplement: s1 [file s1]

## Supplementary Materials: Effect of Surface Modifications of SBA-15 with Aminosilanes and 12-Tungstophosphoric Acid on Catalytic Properties in Environmentally Friendly Esterification of Glycerol with Oleic Acid to Produce Monoolein

Kullatida Ratchadapiban, Piyasan Prasertdam, Duangamol Nuntasri Tungasmita, Chutima Tangku and Wipark Anutrasakda

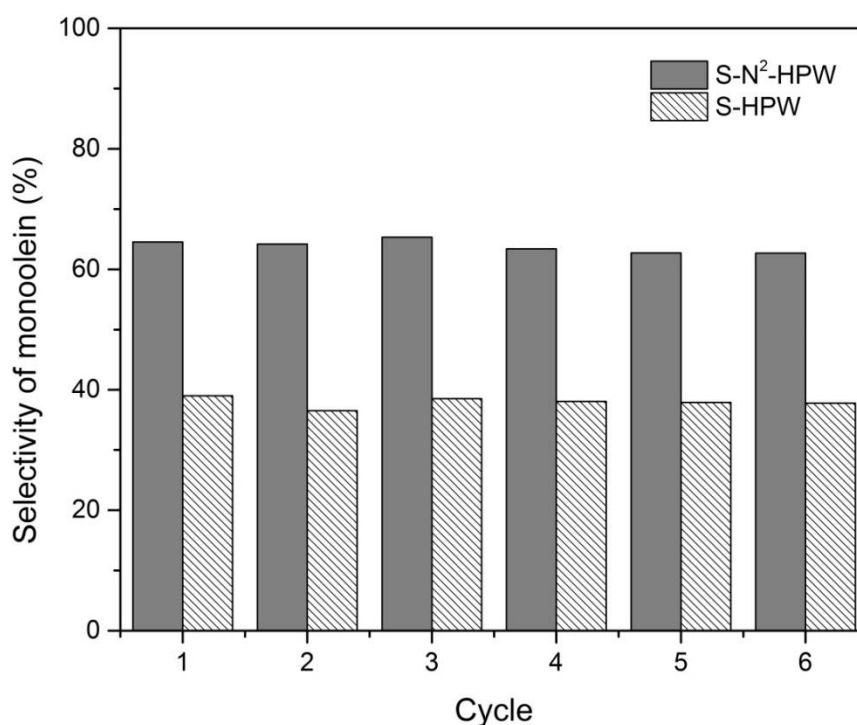

**Figure S1.** Effect of aminosilane functionalization on catalyst reusability using S-N<sup>2</sup>-HPW and S-HPW catalysts in esterification of glycerol with oleic acid for six cycles at 160 °C for 3 h per cycle with 2.5 wt.% of catalyst loading and glycerol/oleic acid molar ratio of 4:1.
